# Supplementary material
Source: publisher site journal article supplement (https://www.oncotarget.com/article/28632)
Supplement: Supplementary file 1 [file 28632]

## Addendum: The importance of integrated therapies on cancer: Silibinin, an old and new molecule

**Elisa Roca<sup>1</sup>, Giuseppe Colloca<sup>2</sup>, Fiorella Lombardo<sup>1</sup>, Andrea Bellieni<sup>2</sup>, Alessandra Cucinella<sup>1</sup>, Giorgio Madonia<sup>1</sup>, Licia Martinelli<sup>1</sup>, Maria Elisa Damiani<sup>1</sup>, Ilenia Zampieri<sup>1</sup> and Antonio Santo<sup>1</sup>**

<sup>1</sup>Oncologia Toracica - Lung Unit, Ospedale P. Pederzoli - Via Monte Baldo, Peschiera del Garda (VR), Italy

<sup>2</sup>Dipartimento di Scienze dell'invecchiamento, Neurologiche, Ortopediche e della testa-collo, Fondazione Policlinico Universitario "A. Gemelli" IRCCS, Rome, Italy

**Published:**

**Copyright:** © 2024 Roca et al. This is an open access article distributed under the terms of the [Creative Commons Attribution License](#) (CC BY 4.0), which permits unrestricted use, distribution, and reproduction in any medium, provided the original author and source are credited.

**This article has an addendum:** This article received a publication fee waiver.

Original article: Oncotarget. 2024; 15:345–353. <https://doi.org/10.18632/oncotarget.28587>
